# Supplementary material for: Transcatheter Aortic Valve Replacement with the Self-Expandable Core Valve Evolut Prosthesis Using the Cusp-Overlap vs. Tricusp-View
Source: MDPI journal article supplement (doi:10.3390/jcm11061561), 2022-03-12
Supplement: s1 [file s1]

## Supplementary Materials

**Table S1.** Baseline pharmacologic therapy.

|                                      | All       | Three-Cusp View | Cusp-Overlap View | <i>p</i> -Value |
|--------------------------------------|-----------|-----------------|-------------------|-----------------|
| N                                    | 122       | 61              | 61                |                 |
| Betablockers                         | 78 (63.9) | 38 (62.3)       | 40 (65.6)         | 0.85            |
| Amiodarone                           | 2 (1.6)   | 1 (1.6)         | 1 (1.6)           | 1.00            |
| Digitalis                            | 1 (0.8)   | 1 (1.6)         | 0 (0.0)           | 1.00            |
| Ivabradine                           | 1 (0.8)   | 1 (1.6)         | 0 (0.0)           | 1.00            |
| Calcium Antagonists (Verapamil-Type) | 1 (0.8)   | 1 (1.6)         | 0 (0.0)           | 1.00            |

Qualitative data are presented as *n* (%).
